# Supplementary material for: Long‐read whole‐genome sequencing for the genetic diagnosis of dystrophinopathies
Source: PubMed Central journal article supplement — Ann Clin Transl Neurol. 2020 Sep 20;7(10):2041–6. doi: 10.1002/acn3.51201 (PMC7545597; doi:10.1002/acn3.51201), 2020-09-20
Supplement: ACN3-7-2041-s002.pdf [file ACN3-7-2041-s002.pdf]

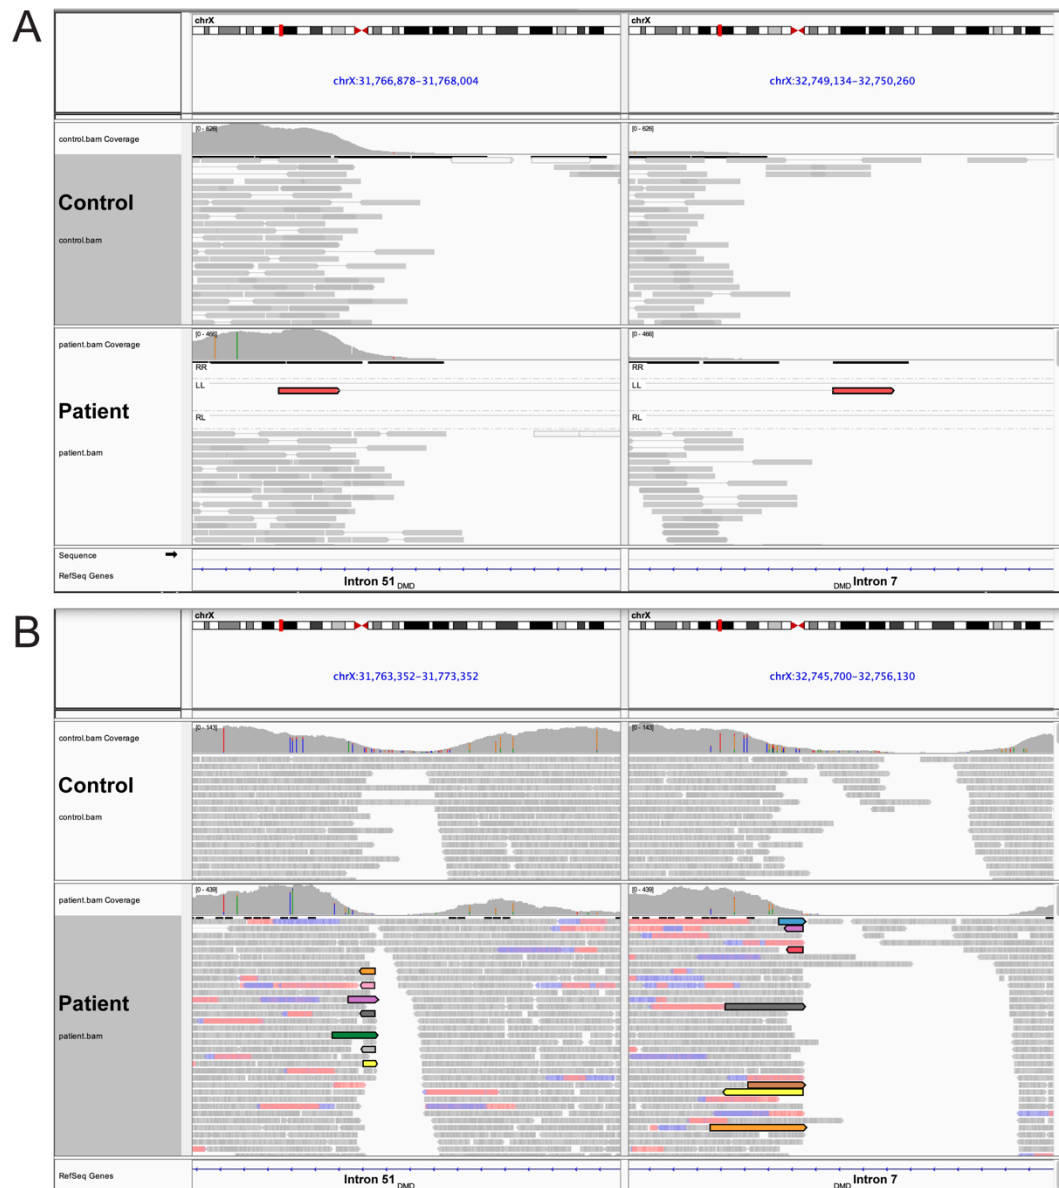

**Supplementary Figure 2. Indications for the complex structural variant in *DMD* found in short- and long-read whole *DMD* gene sequencing. (A) An integrative genomics viewer (IGV) screenshot of short-read whole *DMD* gene sequencing showing that there was one pair of reads indicating a possible inversion involving exons 8–51 (indicated in the red pair-reads; patient track). No short reads indicating possible disease-causing structural variants were found in a healthy control track. (B) An IGV screenshot of long-read whole *DMD* gene sequencing showing 10 reads (not fully presented in the IGV screenshot) indicating a possible inversion involving exons 8–51**

(indicated in the colorful reads with black frame; patient track). No long reads indicating possible disease-causing structural variants were found in a healthy control track.
